# Supplementary material for: Bifunctionalized Core–Shell Magnetic Nanoparticles Enabling Catalytically Amplified Chemiluminescence for Ultrasensitive Detection of Pyrophosphate ions
Source: Research Square preprint supplement (doi:10.21203/rs.3.rs-8698517/v1), 2026-02-04
Supplement: Supplementary file 1 [file 22c94fb7aa997b2eac5c8110.docx]

**Supplementary material**

**Bifunctionalized Core–Shell Magnetic Nanoparticles Enabling Catalytically Amplified Chemiluminescence for Ultrasensitive Detection of Pyrophosphate ions**

Congwen Ruan, Mengchun Tian, Lingfeng Gao*, Zehao Li*

Email: [lfgao@wtu.edu.cn](mailto:lfgao@wtu.edu.cn)

College of Chemistry and Chemical Engineering, Wuhan Textile University, Wuhan, Hubei, 430200, P. R. China

Hubei Key Laboratory for Clean Recycling and Resource Utilization of Waste Fibers, Hubei, 430200, P. R. China

**Table S1.**

| Method | Sensing probe | Linear range(μM) | Detection limit(μM) | Reference |
| --- | --- | --- | --- | --- |
| Fluorescence | NAC-CdTe QDs | 0-40 | 0.28 | [1] |
| Fluorescence | Au NCs@EW@Lzm | 131.00-685.40 | 2.56 | [2] |
| Fluorescence | L-Arg@Mea-CdTe | 0-45 | 0.30 | [3] |
| Fluorescence | [Zn(L)Cl2] | 2.5-50 | 2.5 | [4] |
| Fluorescence | GSH-Au NCs | 5-50 | 1.2 | [5] |
| Fluorescence | [(Zn)2(L2)2Cl2(DMSO)2] | 0-30 | 0.025 | [6] |
| Fluorescence | [ZnL] | unmentioned | 0.3 | [7] |
| Colorimetry | Cu@PB NCs | 1-7 | 0.245 | [8] |
| Colorimetry | CdCl2L | unmentioned | 2.4 | [9] |
| Colorimetry | FeMoO4 | 0.5-25 | 0.3 | [10] |
| Colorimetry | Luminol-Ga | 0.5-15 | 0.0624 | [11] |
| Electrochemiluminescence | 1-2Zn | 6.6-13.3 | 4.0 | [12] |
| Chemiluminescence | BFCS-Fe3O4@Au NPs | 0.0001-10 | 0.00000837 | This work |

**Table S2.**

| samples | PPi detected (nM) | PPi added (nM) | Found (nM)  (mean±σ, n=3) | Recovery (%) | RSD (%) |
| --- | --- | --- | --- | --- | --- |
| 1 | 0.4 | 2.5 | 3.0±0.1 | 102.3 | 4.6 |
| 2 | 0.4 | 25 | 24.5±1.1 | 96.4 | 4.6 |
| 3 | 0.4 | 50 | 49.9±0.8 | 99.0 | 1.6 |


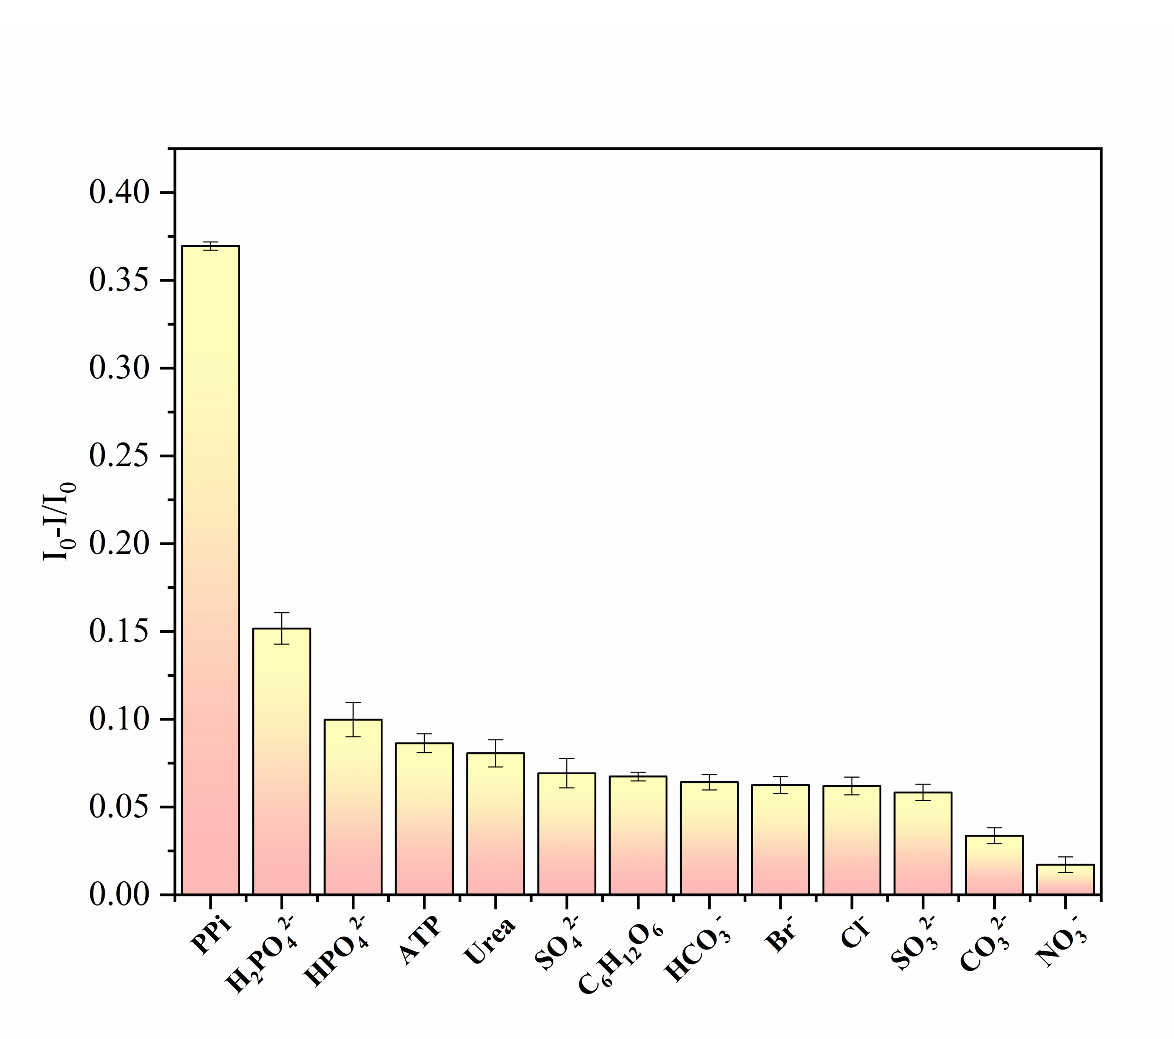


**Figure. S1** Selectivity of the proposed CL sensing platform for PPi

**References**

1. Chen W, Chen T, Fang M, Zhu W, Li C (2024) Continuous detection of cobalt ions and pyrophosphates by NAC-CdTe quantum dots fluorescence probes. J Fluoresc 35(4):2261-2272. <http://doi.org/10.1007/s10895-024-03671-3>

2. Li W, Wang R, Yang Z, Zhou X, Yan W, Li Y (2023) A copper ion-mediated on-off-on gold nanocluster for pyrophosphate sensing and bioimaging in cells. Anal Chim Acta 1249 <http://doi.org/10.1016/j.aca.2023.340923>

3. Chen T, Ge Z, Fang M, Zhu W, Li C (2023) A novel L-arginine functionalized CdTe quantum dots fluorescence probe for pyrophosphate anion detection. J Fluoresc 33(5):2075-2084. <http://doi.org/10.1007/s10895-023-03198-z>

4. Purohit A, Kisan H, Sahu S, Kar P (2021) Highly selective and sensitive optical discrimination of pyrophosphate ion by a Zn(ll)-terpyridine complex in aqueous medium at physiological pH. J Mol Struct 1243 <http://doi.org/10.1016/j.molstruc.2021.130868>

5. Cao H, Zhao T, Liu M, Guo L, He Y, Zhang K, Mai X, Li N (2023) Ratiometric optical detection of pyrophosphate based on aggregation‐caused dual‐signal response of gold nanoclusters. Luminescence 38(8):1458-1464. <http://doi.org/10.1002/bio.4527>

6. Raj P, Singh A, Singh A, Singh A, Garg N, Kaur N, Singh N (2019) Pyrophosphate prompted aggregation‐induced emission: chemosensor studies, cell imaging, cytotoxicity, and hydrolysis of the phosphoester bond with alkaline phosphatase. Eur J Inorg Chem 2019(5):628-638. <http://doi.org/10.1002/ejic.201801173>

7. Das D, Sutradhar S, Singh A, Ghosh B (2021) Zinc‐terpyridine based chemosensor for detection of pyrophosphate anion in aqueous medium. Zeitschrift für anorganische und allgemeine Chemie 647(11):1234-1238. <http://doi.org/10.1002/zaac.202100054>

8. Fan S, Jiang X, Yang M, Wang X (2021) Sensitive colorimetric assay for the determination of alkaline phosphatase activity utilizing nanozyme based on copper nanoparticle-modified Prussian blue. Analytical and Bioanalytical Chemistry 413(15):3955-3963. <http://doi.org/10.1007/s00216-021-03347-y>

9. Das D, Sutradhar S, Gomila R, Rissanen K, Frontera A, Ghosh B (2023) Synthesis, structure and application of a simple cadmium(II)-terpyridine complex as sensor material for selective detection of pyrophosphate anion. J Mol Struct 1273 <http://doi.org/10.1016/j.molstruc.2022.134269>

10. Yang H, Liu Z, Liu C, Zhang Y (2022) FeMoO4 nanospheres-based nanozymatic colorimetry for rapid and sensitive pyrophosphate detection. J Mater Chem B 10(2):321-327. <http://doi.org/10.1039/d1tb01892b>

11. Tian X, Qi W, Zhao M, Lai J, Wu D, Hu L, Zhang Y (2020) One-pot synthesis of luminol–gallium nanoassemblies and their peroxidase-mimetic activity for colorimetric detection of pyrophosphate. New J Chem 44(48):21176-21182. <http://doi.org/10.1039/d0nj02628j>

12. Sooshin I, Wonbae S, Kim H, Inhong J (2010) Electrogenerated chemiluminescent anion sensing: selective recognition and sensing of pyrophosphate. Anal Chem 82:8259–8265. <http://doi.org/DOI:10.1021/ac1017293>
